# Supplementary material for: Residue-Specific Dock-Loosen-Unfold Mechanism of GB1 on Nanoparticle Surfaces Revealed by Kinetic and Φ-Value Analysis
Source: MDPI journal article supplement (doi:10.3390/biom16010114), 2026-01-08
Supplement: s1 [file biomolecules-3989774-supplementary.pdf › biomolecules-3989774-supplementary.pdf]

## *Supporting Information*

### **Residue-Specific Dock-Loosen-Unfold Mechanism of GB1 on Nanoparticle Surfaces Revealed by Kinetic and $\Phi$ -Value Analysis**

Tingting Liu<sup>1,2</sup>, Yunqiang Bian<sup>1</sup>, Siyu Wang<sup>1,2</sup>, Yang Li<sup>1</sup>, Yi Cao<sup>1,3</sup>, Yonghua Jiao<sup>2,\*</sup>, Hai Pan<sup>1,\*</sup>

<sup>1</sup> Wenzhou Institute, University of Chinese Academy of Sciences, Wenzhou, Zhejiang 325001, China

<sup>2</sup> College of Life and Health Sciences, Northeastern University, Shenyang, Liaoning 110819, China

<sup>3</sup> Chemistry and Biomedicine Innovation Center, Nanjing University, Nanjing, Jiangsu 210093, China

\* Corresponding author. Email: [hpan@ucas.ac.cn](mailto:hpan@ucas.ac.cn); or [jiaoyh@mail.neu.edu.cn](mailto:jiaoyh@mail.neu.edu.cn)

## ADDITIONAL METHOD

**Free Energy Calculation of  $\Delta G_i$  and  $\Delta\Delta G_i$ :** Free energy changes for each step of the adsorption–unfolding pathway were derived from kinetic and equilibrium parameters obtained from the two-step model (Figure S2). For the initial adsorption step ( $N \rightarrow N_s$ ), the standard Gibbs free energy ( $\Delta G_{N \rightarrow N_s}$ ) was calculated from the equilibrium constant  $K_1 = \frac{k_{on}}{k_{off}}$  as:

$$\Delta G_{N \rightarrow N_s} = -RT \ln K_1 = -RT \ln \left( \frac{k_{on}}{k_{off}} \right)$$

where  $R$  is the gas constant ( $1.9872 \times 10^{-3} \text{ kcal} \cdot \text{mol}^{-1} \cdot \text{K}^{-1}$ ) and  $T$  is the absolute temperature (300 K in our case), and  $RT$  is taken as  $0.5962 \text{ kcal} \cdot \text{mol}^{-1}$ .

For the unfolding step ( $N_s \rightarrow U_s$ ), the free energy change ( $\Delta G_{N_s \rightarrow U_s}$ ) was calculated similarly using  $K_2 = \frac{k_u}{k_f}$ :

$$\Delta G_{N_s \rightarrow U_s} = -RT \ln K_2 = -RT \ln \left( \frac{k_u}{k_f} \right)$$

The mutation-induced free energy differences ( $\Delta\Delta G_i$ ) at each transition or state  $i$  were determined as:

$$\Delta\Delta G_i = \Delta G_i^{\text{mut}} - \Delta G_i^{\text{WT}}$$

where  $i$  corresponds to the four key energetic positions:  $T_{\text{ads}}$  (adsorption transition state),  $N_s$  (adsorbed native-like intermediate),  $T_{\text{ads} \rightarrow U}$  (unfolding transition state), and  $U_s$  (unfolded-on-surface ensemble). All calculated  $\Delta G_i$  and  $\Delta\Delta G_i$  values for wild type and mutants are summarized in Table S1 and Table S2, respectively.

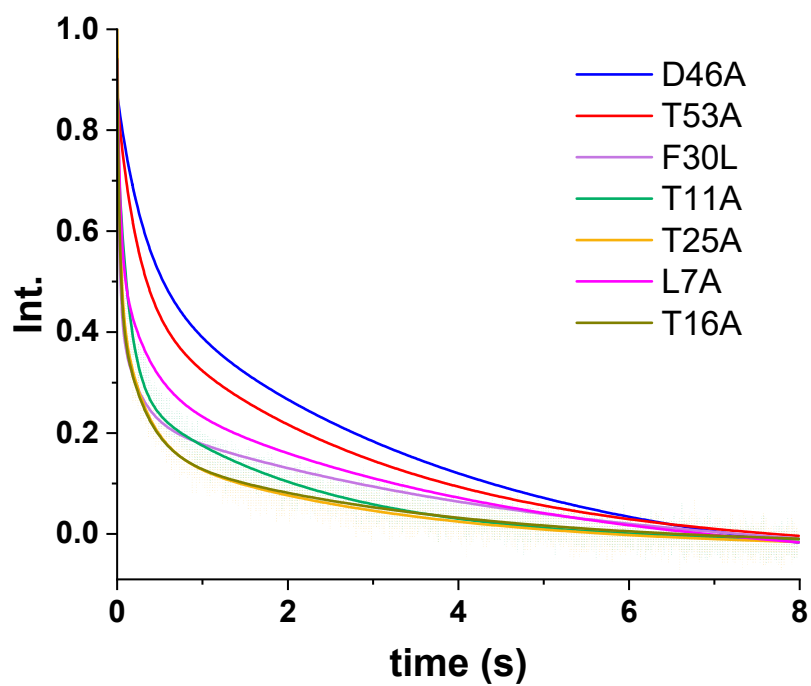

Figure S1. Typical normalized stopped-flow traces of GB1 variants adsorption on latex nanoparticles of 0.05% w/v concentrations in a PBS buffer at pH 7.4. Each trace shown is the average of four to six independent measurements and is fitted with a double exponential function (solid line).

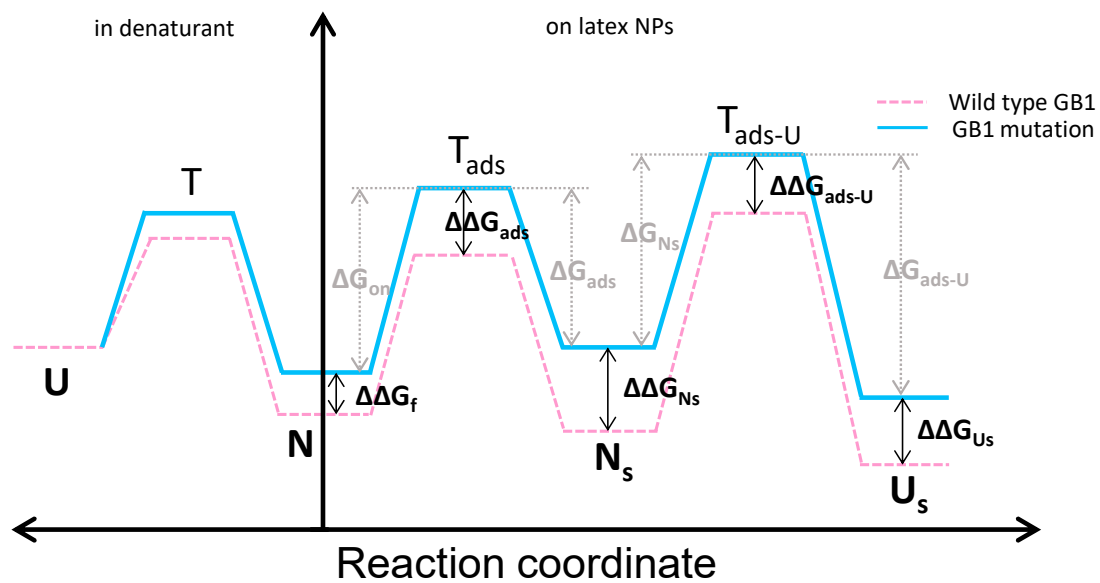

Figure S2. Energy landscape for  $\Delta G$  and  $\Delta\Delta G$  analysis. Schematic representation of the adsorption–unfolding pathway for wild-type GB1 (dashed line) and variants (solid line). The process proceeds from  $N \rightarrow T_{ads} \rightarrow N_s \rightarrow T_{ads-U} \rightarrow U_s$ . Dashed gray arrows indicate  $\Delta G$  values for each step derived from kinetic and equilibrium parameters for GB1 wild-type or variants, while black arrows indicate  $\Delta\Delta G$  obtained by subtracting mutant energies from wild type. The energy of native state was set to zero to simplify the calculations.

Table S1. Summary of  $\Delta G$  values for GB1 variants at four stages of the adsorption pathway.

| $\Delta G$ (kcal·mol <sup>-1</sup> ) | wt   | D46A  | T53A | F30L | T25A | L7A  | T11A | T16A |
|--------------------------------------|------|-------|------|------|------|------|------|------|
| $\Delta G_{\text{on}}$               | 6.52 | 7.61  | 7.02 | 6.19 | 6.75 | 6.51 | 6.51 | 6.4  |
| $\Delta G_{\text{ads}}$              | 6.98 | 8.31  | 7.66 | 7.02 | 7.28 | 6.81 | 6.62 | 6.86 |
| $\Delta G_{\text{Ns}}$               | 7.76 | 8.53  | 8.21 | 8.02 | 7.97 | 7.84 | 7.49 | 7.79 |
| $\Delta G_{\text{ads-U}}$            | 8.81 | 10.87 | 10.1 | 9.33 | 9.06 | 9.23 | 8.88 | 8.9  |

Table S2. Summary of  $\Delta\Delta G$  values for GB1 variants at four stages of the adsorption pathway.

| $\Delta\Delta G$ (kcal·mol <sup>-1</sup> ) | wt | D46A | T53A | F30L | T25A  | L7A  | T11A | T16A |
|--------------------------------------------|----|------|------|------|-------|------|------|------|
| * $\Delta\Delta G_{\text{f}}$              | -  | 1.74 | 1.91 | 1.42 | -0.22 | 1.85 | 0.6  | 0.38 |
| $\Delta\Delta G_{\text{ads}}$              | -  | 2.83 | 2.41 | 1.09 | 0.01  | 1.84 | 0.59 | 0.22 |
| $\Delta\Delta G_{\text{Ns}}$               | -  | 1.5  | 1.73 | 1.05 | -0.29 | 2.01 | 0.92 | 0.38 |
| $\Delta\Delta G_{\text{ads-U}}$            | -  | 2.27 | 2.18 | 1.31 | -0.08 | 2.09 | 0.65 | 0.41 |
| $\Delta\Delta G_{\text{Us}}$               | -  | 0.21 | 0.89 | 0.79 | -0.33 | 1.67 | 0.58 | 0.32 |

\* These values were adapted from reference [26].
